# Supplementary material
Source: MDPI journal article supplement (https://www.mdpi.com/2075-4701/10/9/1142)

## Supporting Information

Crystallographic representation of all the stable configurations including metastable ones for the solid solution phases, compound phases, Laves and TCP phases of the Al-Ni system.

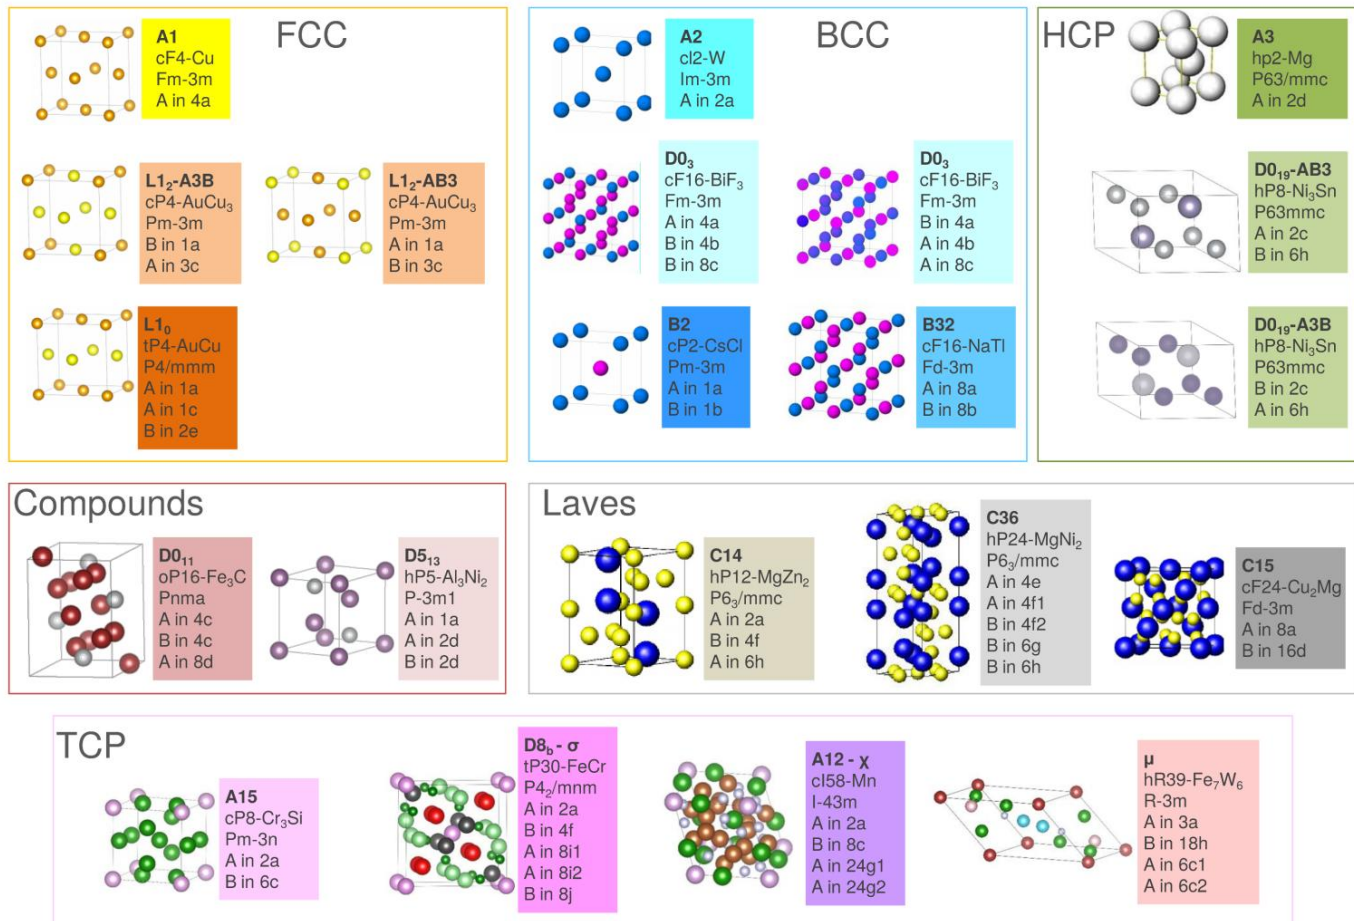

Supplement: s1 [file s1]
